# Supplementary material for: Cobalt phosphide-based electrocatalysts: synthesis and phase catalytic activity comparison for hydrogen evolution
Source: Royal Society of Chemistry journal article supplement (doi:10.1039/c6ta00575f), 2016-01-01
Supplement: c6ta00575f1.pdf [file c6ta00575f1.pdf]

**Supporting Information for**  
**Cobalt phosphide-based electrocatalysts: Synthesis and phase**  
**catalytic activity comparison for hydrogen evolution**

Yuan Pan, Yan Lin, Yinjuan Chen, Yunqi Liu\*, Chenguang Liu\*

*State Key Laboratory of Heavy Oil Processing, Key Laboratory of Catalysis, China University of*

*Petroleum, 66 West Changjiang Road, Qingdao, Shandong 266580, P. R. China*

---

\* Corresponding author. E-mail address: [liuyq@upc.edu.cn](mailto:liuyq@upc.edu.cn); [cgliu1962@sina.com](mailto:cgliu1962@sina.com)

Tel.: +86-532-86981861; +86-532-86981716.

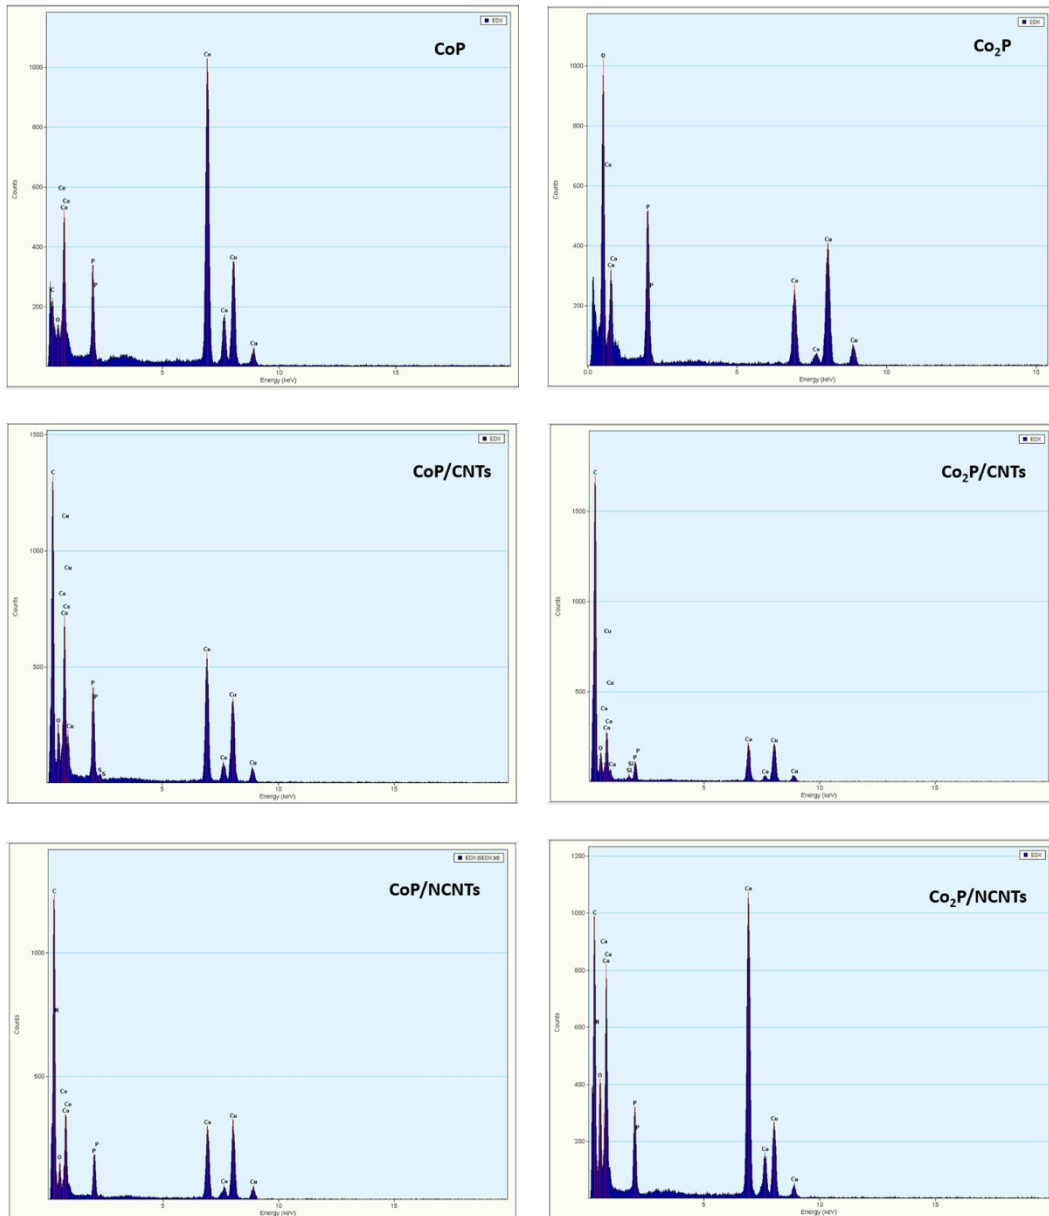

**Fig. S1** EDX spectra of the as-synthesized cobalt phosphide-based catalysts.

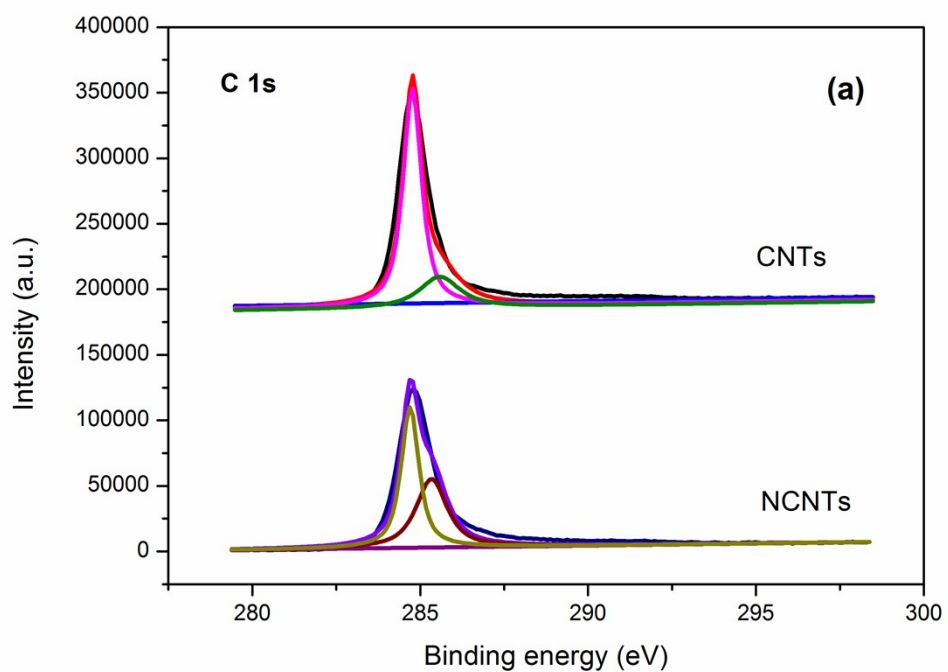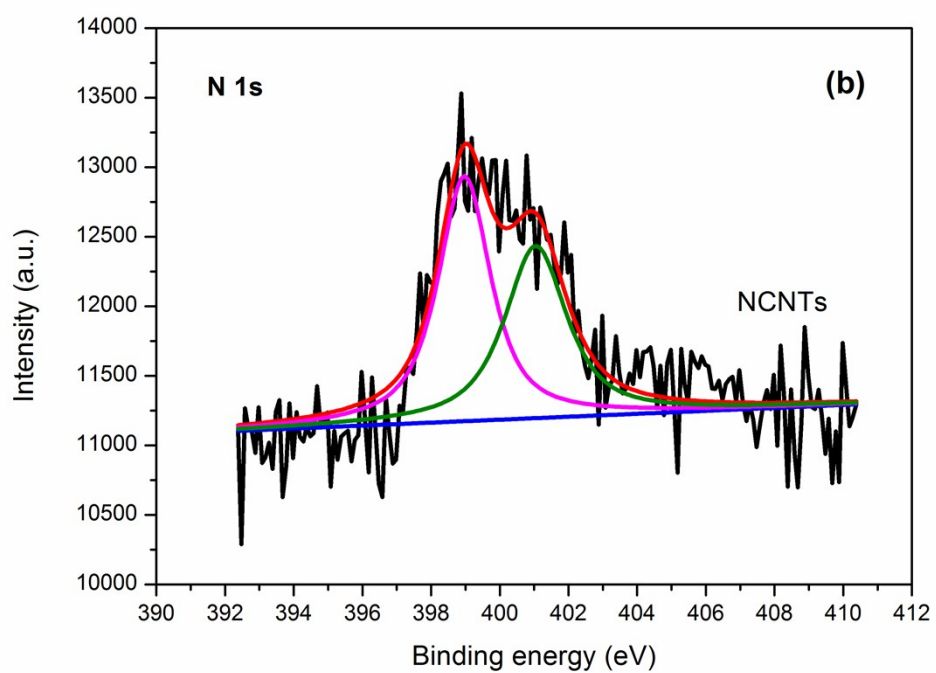

**Fig. S2** XPS spectra in the C (1s) and N (1s) regions for the CNTs and NCNTs.

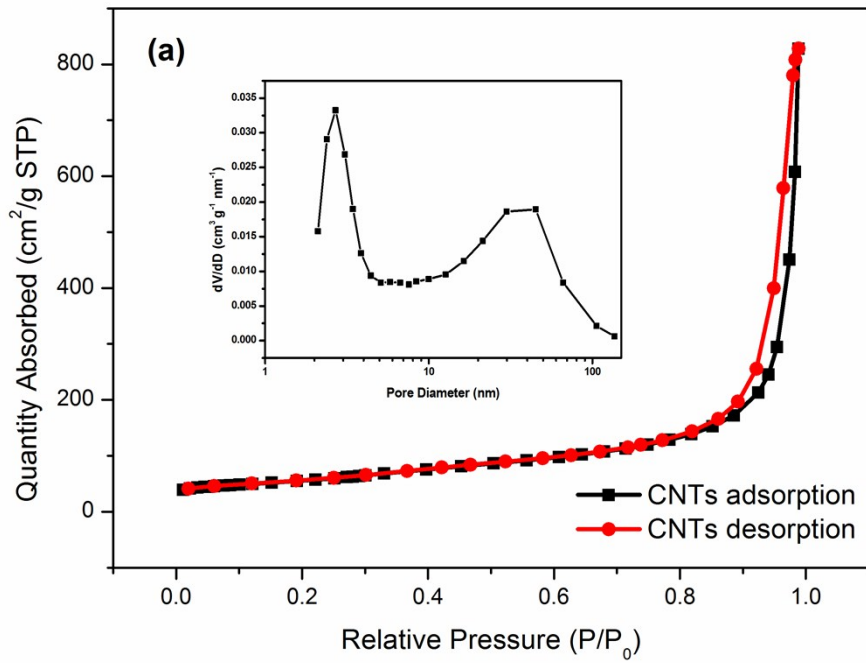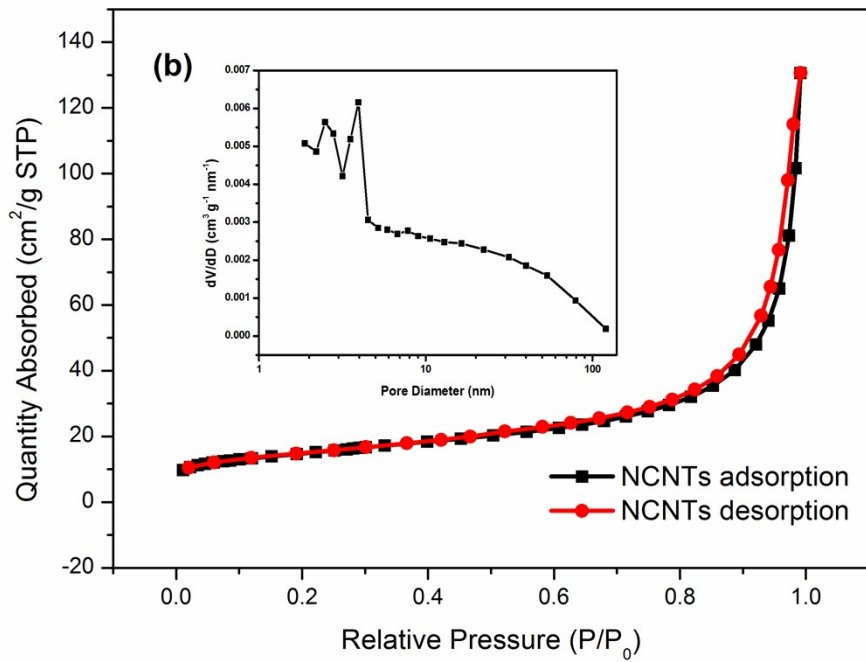

**Fig. S3**  $\text{N}_2$  adsorption-desorption isotherms and Barrett-Joyner-Halenda (BJH) pore-size distribution (inset in Fig. S3) of (a) CNTs and (b) NCNTs

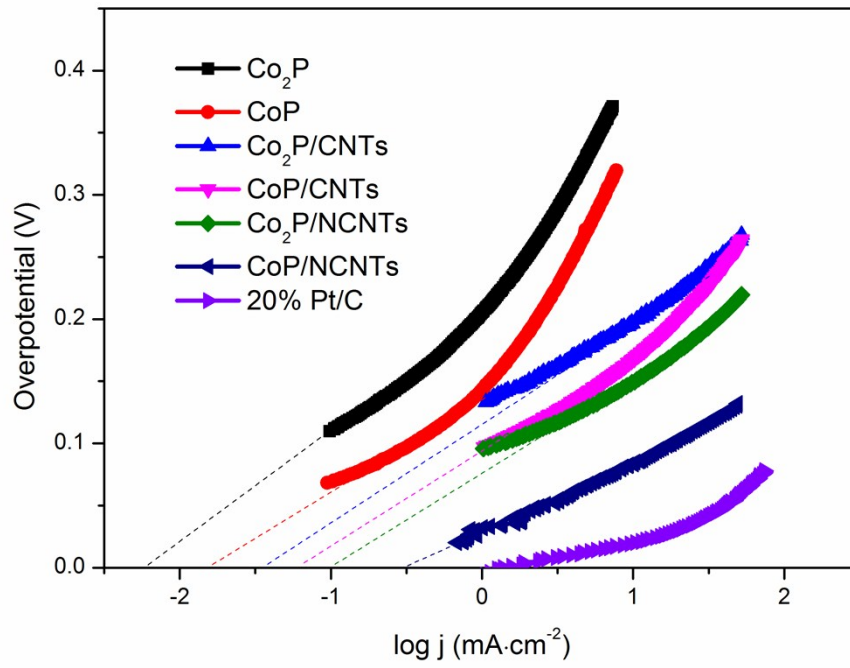

**Fig. S4** Calculated exchange current density of the as-synthesized cobalt phosphide-based catalysts by using extrapolation methods.

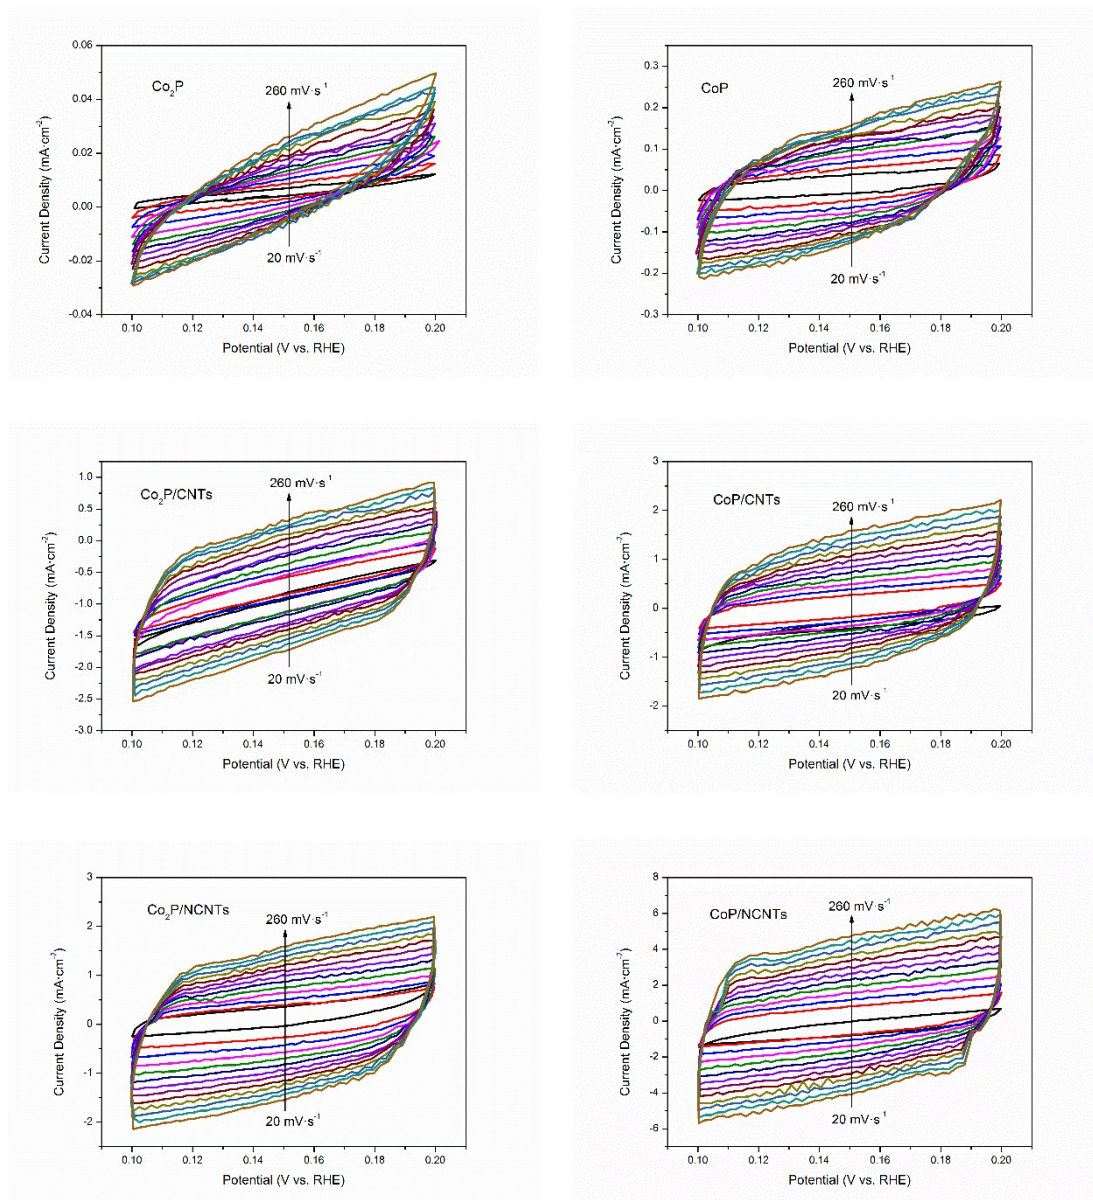

**Fig. S5** Cyclic voltammety curves of the as-synthesized cobalt phosphide-based catalysts in 0.5 M H<sub>2</sub>SO<sub>4</sub> solution in the region of 0.1-0.2 V vs. RHE with different scan rates from 20 mV·s<sup>-1</sup> to 260 mV·s<sup>-1</sup>.

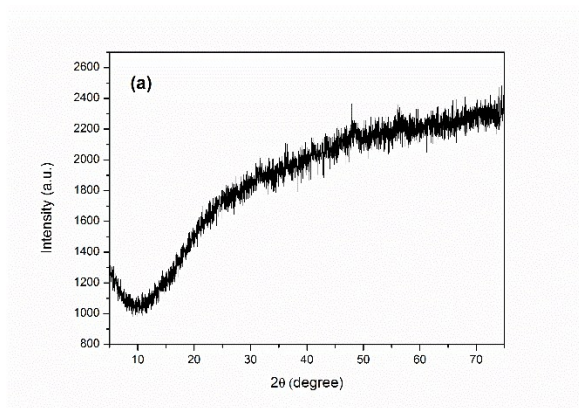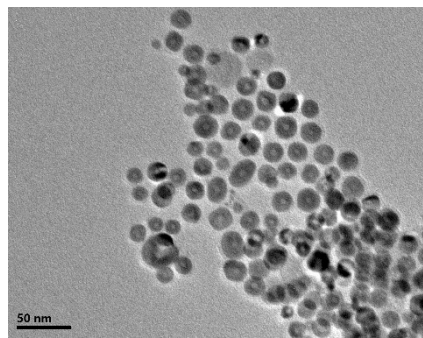

**Fig. S6** XRD and TEM results of the as-synthesized CoP nanoparticles.

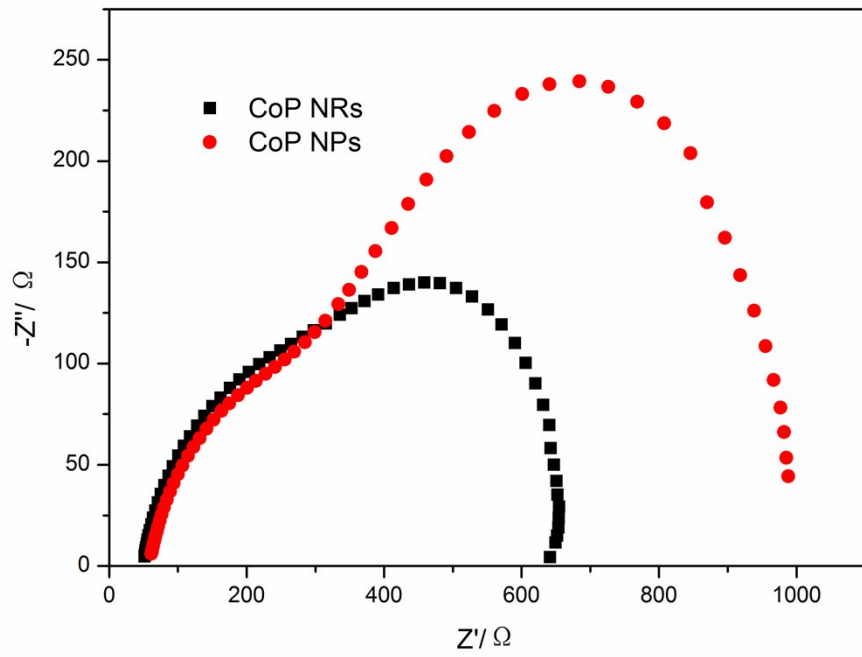

**Fig. S7** Nyquist plots of the as-synthesized CoP NRs and CoP NPs in 0.5 M  $\text{H}_2\text{SO}_4$  with an overpotential of 200 mV.



**Table S1** Comparison of HER performance of some transition metal phosphide catalysts in 0.5 M H<sub>2</sub>SO<sub>4</sub> solution.

| Catalyst                                | Current density<br>(mA·cm <sup>-2</sup> ) | Overpotential<br>(mV) | Tafel slope<br>(mV·dec <sup>-1</sup> ) | Reference |
|-----------------------------------------|-------------------------------------------|-----------------------|----------------------------------------|-----------|
| CoP/NCNTs                               | 10                                        | 79                    | 49                                     | This work |
| CoP/CC                                  | 20                                        | 100                   | 51                                     | 24        |
| CoP Hollow Polyhedrons                  | 10                                        | 159                   | 59                                     | 25        |
| urchin-like CoP                         | 100                                       | 180                   | 46                                     | 26        |
| Co <sub>0.59</sub> Fe <sub>0.41</sub> P | 10                                        | 72                    | 52                                     | 27        |
| CoP/RGO                                 | 10                                        | 156.89                | 70.2                                   | 28        |
| CoP/MPC                                 | 10                                        | 141.73                | 69.8                                   | 28        |
| CoP/MCV                                 | 10                                        | 134.34                | 63.1                                   | 28        |
| CoP/OMC                                 | 10                                        | 112.18                | 56.7                                   | 28        |
| CoP CPHs                                | 10                                        | 133                   | 51                                     | 29        |
| CoP microspheres                        | 10                                        | 226                   | 76                                     | 30        |
| Porous FeP                              | 10                                        | 240                   | 67                                     | 31        |
| IPNTs                                   | 10                                        | 88                    | 35.5                                   | 32        |
| FeP NWs/rGO                             | 10                                        | 107                   | 58.5                                   | 33        |
| Cu <sub>3</sub> P nanowire/CF           | 10                                        | 143                   | 67                                     | 34        |
| MoP-CA2                                 | 10                                        | 125                   | 54                                     | 35        |
| Ni <sub>2</sub> P/CNT                   | 10                                        | 124                   | 53                                     | 36        |
| WP NAs/CC                               | 10                                        | 130                   | 69                                     | 37        |

**Table S2** Calculations of the exchange current density of the as-synthesized cobalt phosphide-based catalysts and 20 % Pt/C catalyst by using extrapolation methods.

| Catalyst                | $\log( j \text{ (mA}\cdot\text{cm}^{-2}) )$ at $\eta=0$ | Exchange current density $j_0$ [mA $\cdot$ cm $^{-2}$ ] |
|-------------------------|---------------------------------------------------------|---------------------------------------------------------|
|                         | V                                                       |                                                         |
| Co <sub>2</sub> P       | -2.2                                                    | 0.0032                                                  |
| CoP                     | -1.77                                                   | 0.017                                                   |
| Co <sub>2</sub> P/CNTs  | -1.41                                                   | 0.039                                                   |
| CoP/CNTs                | -1.17                                                   | 0.068                                                   |
| Co <sub>2</sub> P/NCNTs | -0.99                                                   | 0.102                                                   |
| CoP/NCNTs               | -0.5                                                    | 0.32                                                    |
| 20 % Pt/C               | 0.17                                                    | 1.48                                                    |

**Table S3** ICP element composition and content analysis of the electrolyte after reaction.

|                            | Co (mg/L) | P (mg/L) | S (mg/L) |
|----------------------------|-----------|----------|----------|
| Electrolyte after reaction | 36.84     | 12.67    | 5103.68  |

**Table S4** Values of elements in equivalent circuit resulted from fitting the EIS data of the as-synthesized CoP/NCNTs catalyst.

| Potential<br>(mV) vs. RHE | $R_s$<br>( $\Omega$ ) | Q<br>( $F \cdot cm^{-2} \cdot S^{n-1}$ ) | n   | R<br>( $\Omega$ ) |
|---------------------------|-----------------------|------------------------------------------|-----|-------------------|
| -60                       | 9.85                  | 3.9E-3                                   | 0.8 | 268.3             |
| -80                       | 9.95                  | 4.5E-3                                   | 0.8 | 109.3             |
| -100                      | 9.87                  | 4.9E-3                                   | 0.8 | 50.95             |
| -120                      | 10.16                 | 5.4E-3                                   | 0.8 | 28.22             |
| -140                      | 10.37                 | 5.7E-3                                   | 0.8 | 10.56             |
